# Supplementary material for: The nuclear sirtuin SIRT6 protects the heart from developing aging-associated myocyte senescence and cardiac hypertrophy
Source: Aging (Albany NY). 2021 May 2;13(9):12334–58. doi: 10.18632/aging.203027 (PMC8148452; doi:10.18632/aging.203027)
Supplement: Supplementary Figures [file aging-13-203027-s001.pdf]

## SUPPLEMENTARY FIGURES

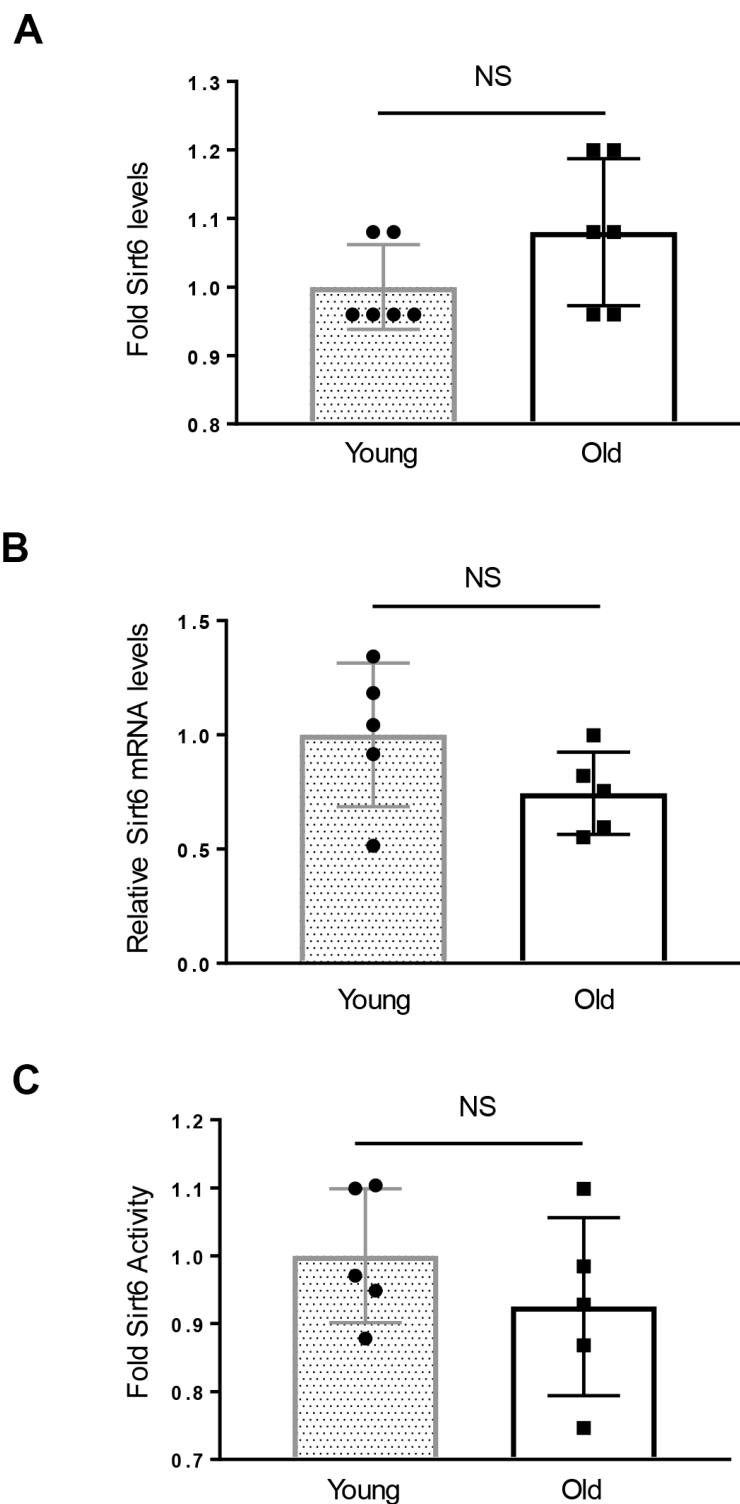

**Supplementary Figure 1.** SIRT6 levels and enzymatic activity are not affected by aging: (A) Relative Sirt6 protein and (B) mRNA levels and (C) fold Sirt6 activity in the heart of young and old mice. Values are mean  $\pm$  SE, n = 5, P=NS (Not significant).

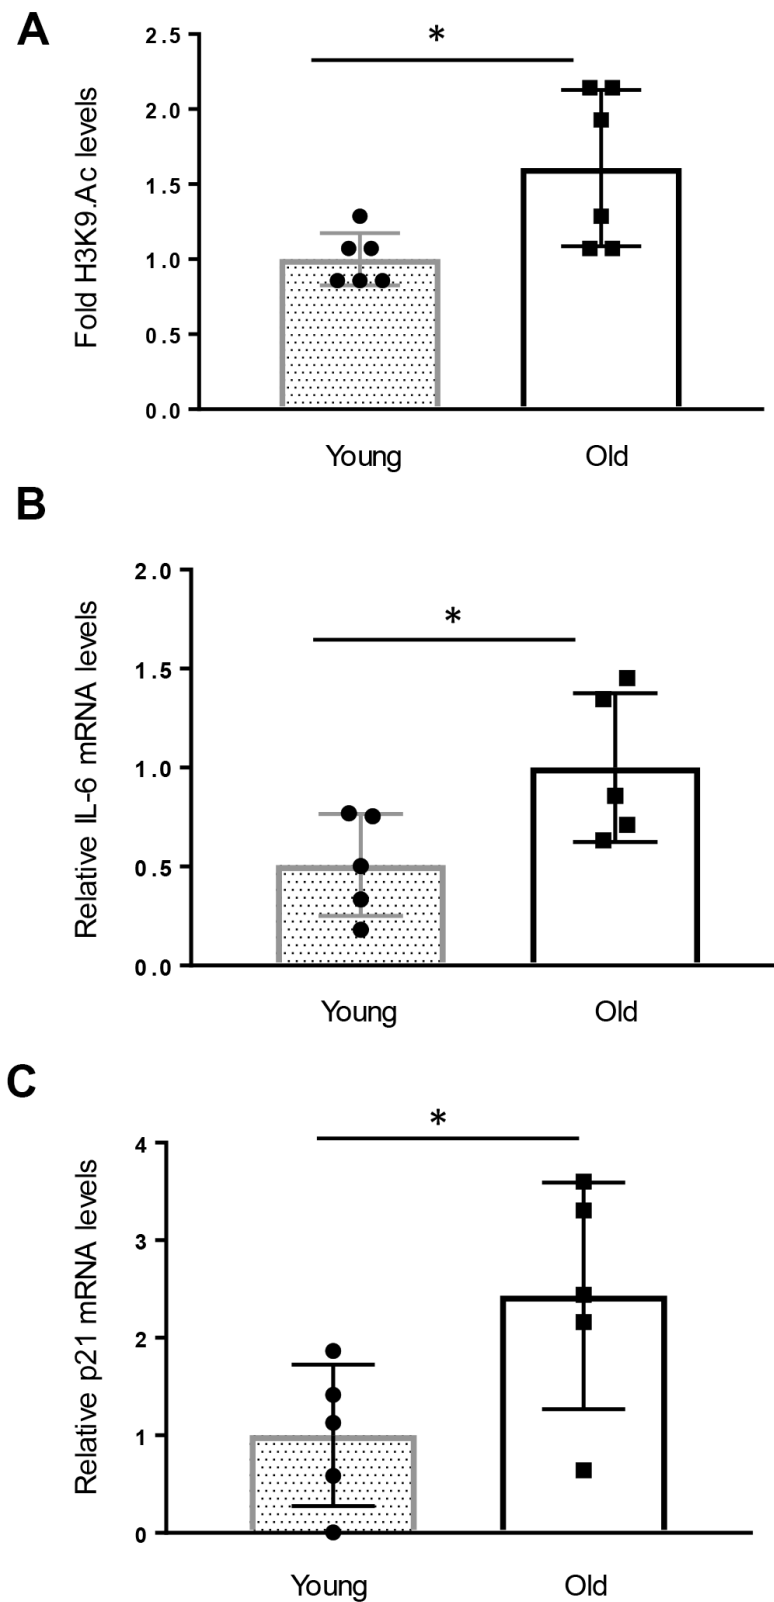

**Supplementary Figure 2.** Aged mice show increased histone 3 acetylation and increased NF- $\kappa$ B target gene activation: (A) Relative acetylated histone H3K9 levels and (B) relative IL-6 and (C) p21 mRNA levels in the heart of young and old mice. Values are mean  $\pm$  SE,  $n = 5-6$ , \*  $P < 0.05$ .

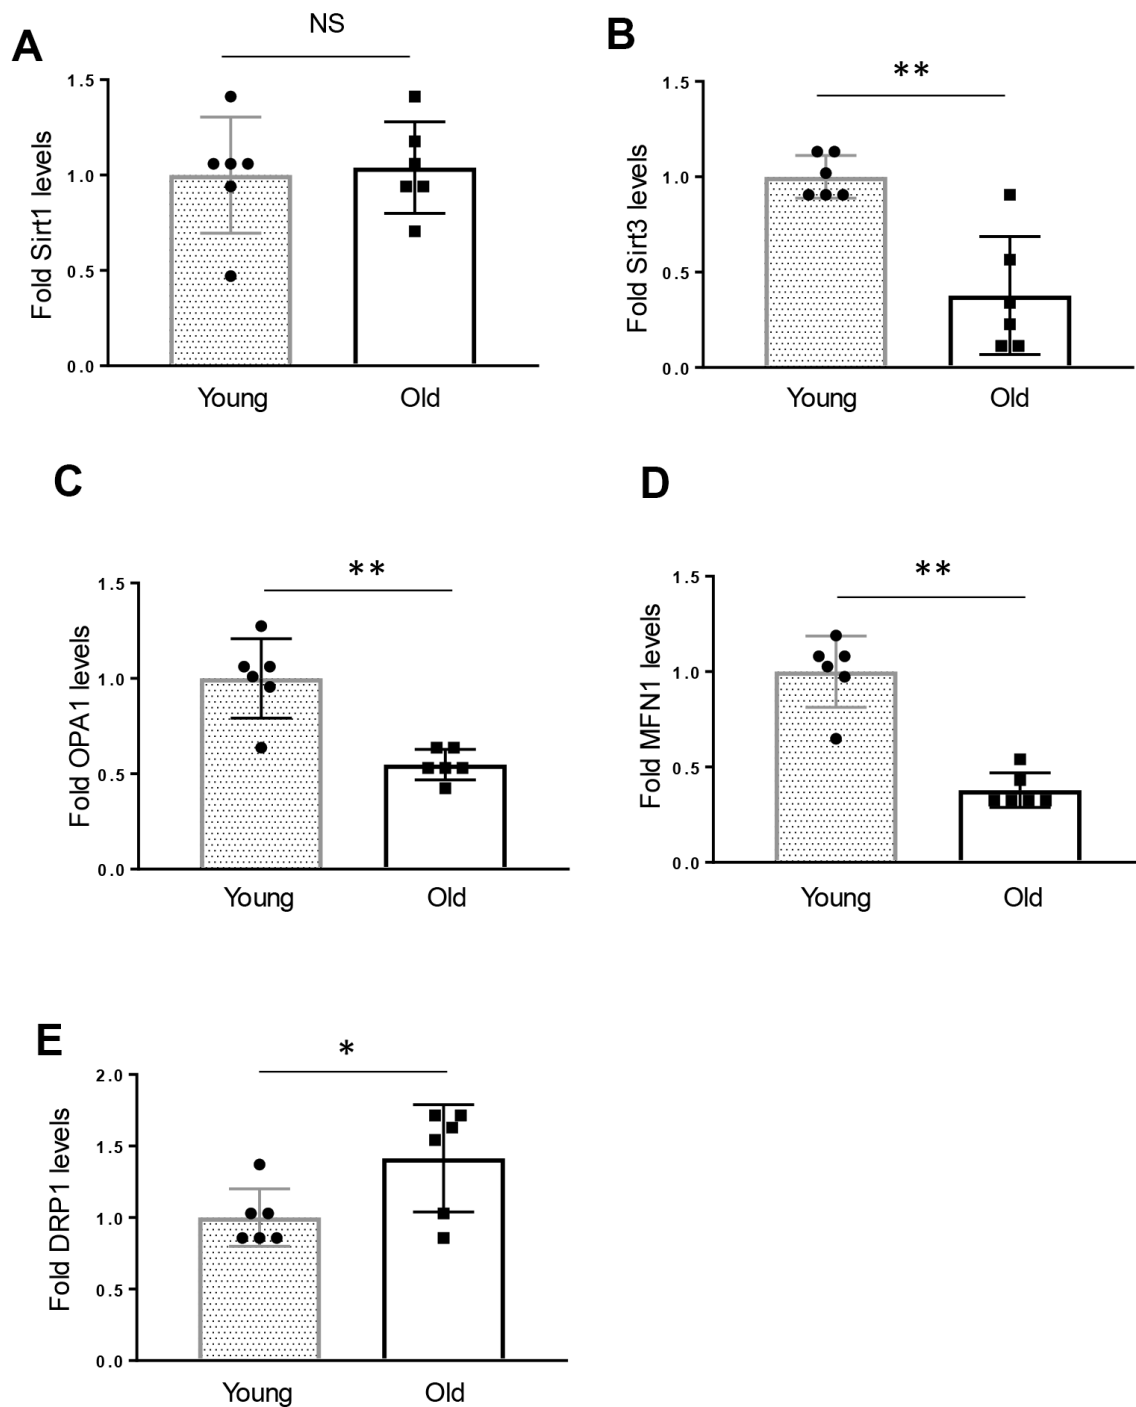

**Supplementary Figure 3.** Quantification of the western blot in Figure 1F: (A–E). Quantification of relative Sirt1, Sirt3, OPA1, MFN1 and DRP1 levels in the heart of young and old mice. Values are mean  $\pm$  SE, n = 6 \* P < 0.05, \*\* P < 0.01 (NS=not significant).

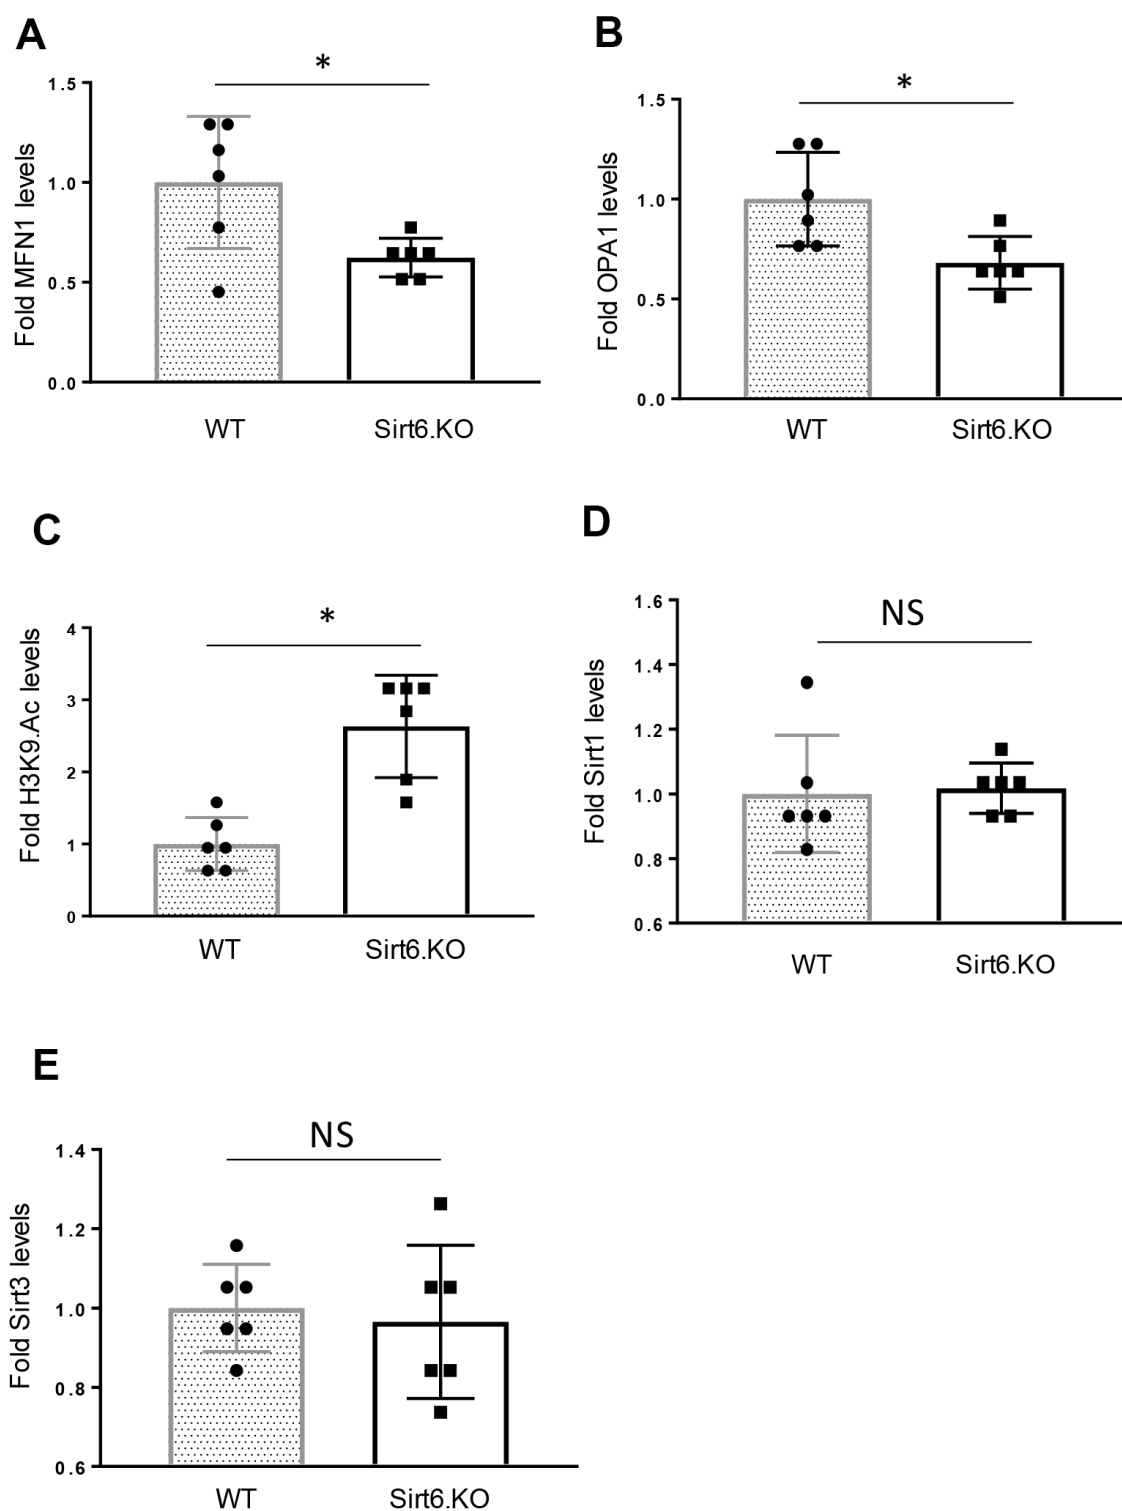

**Supplementary Figure 4.** Quantification of the western blot in Figure 3F: (A–E). Quantification of relative MFN1, OPA1, acetylated histone H3K9, Sirt1 and Sirt3 levels in the heart of Wild type and Sirt6.KO mice. Values are mean  $\pm$  SE, n = 6, \* P < 0.01 (NS=not significant).

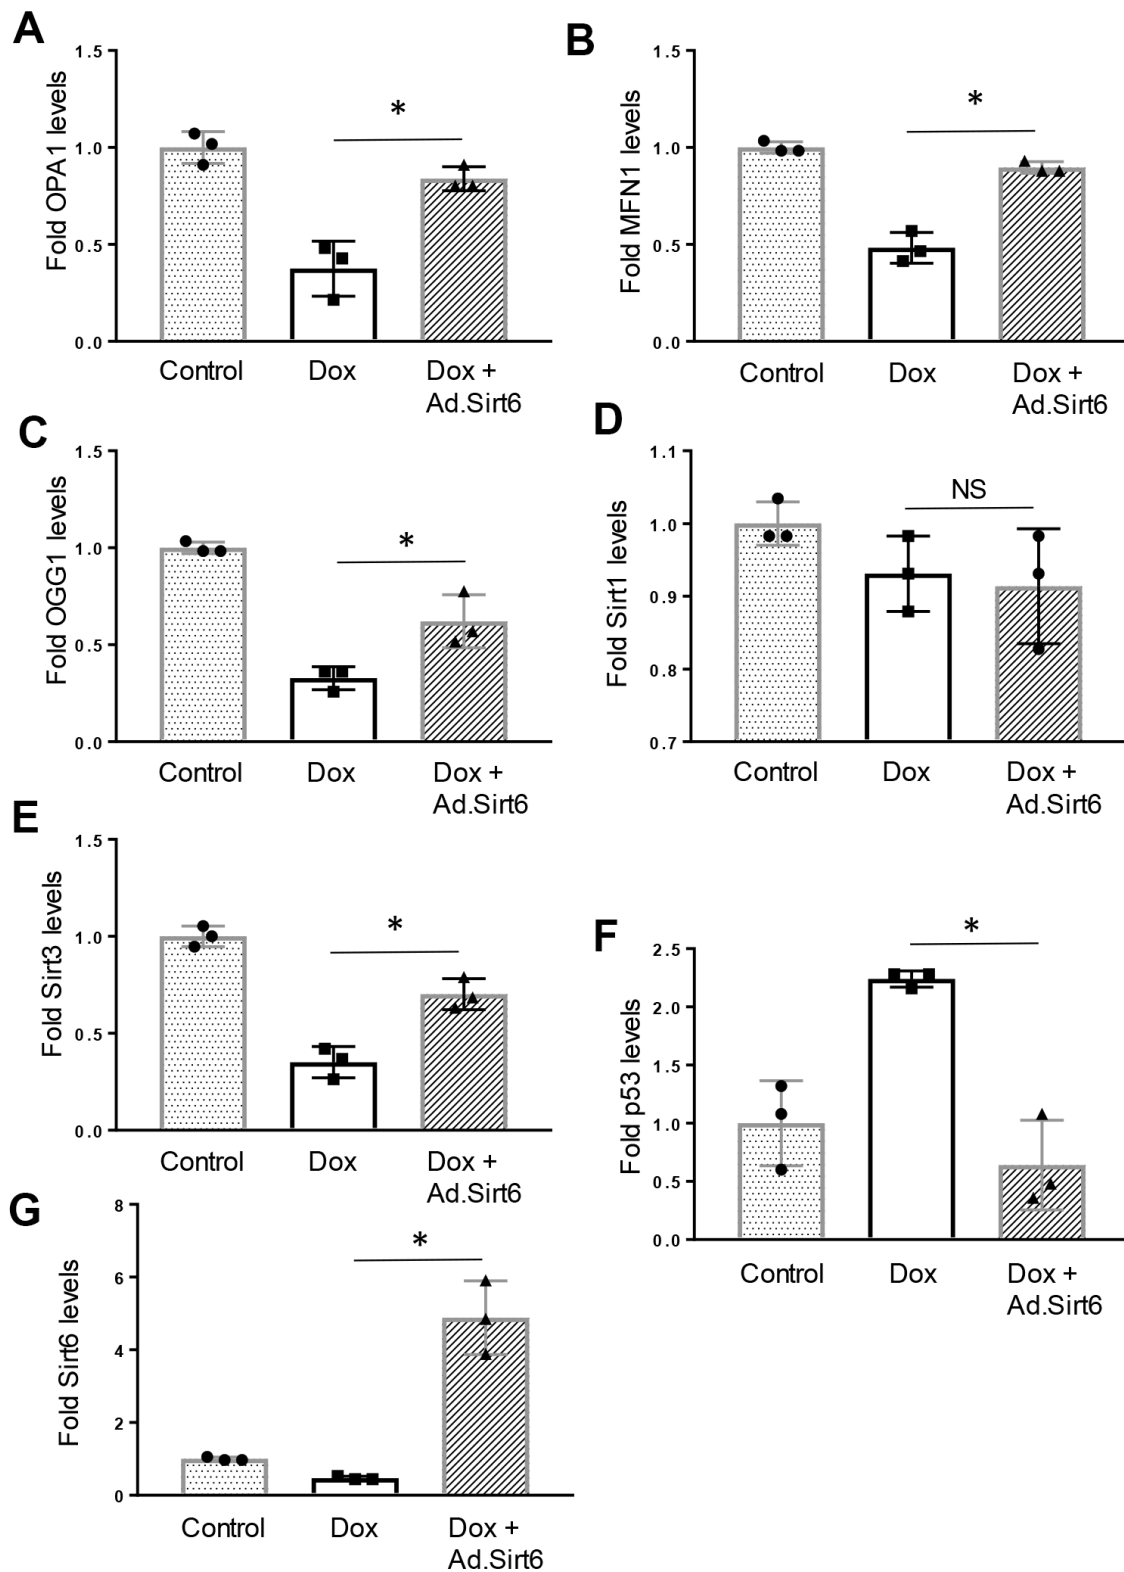

**Supplementary Figure 5.** Quantification of the western blot in Figure 5C: (A–G). Quantification of relative OPA1, MFN1, OGG, Sirt1, Sirt3, p53, and Sirt6 levels in cardiomyocytes treated as indicated. Values are average of three independent experiments, mean  $\pm$  SE, \*  $P < 0.01$  (NS=not significant).

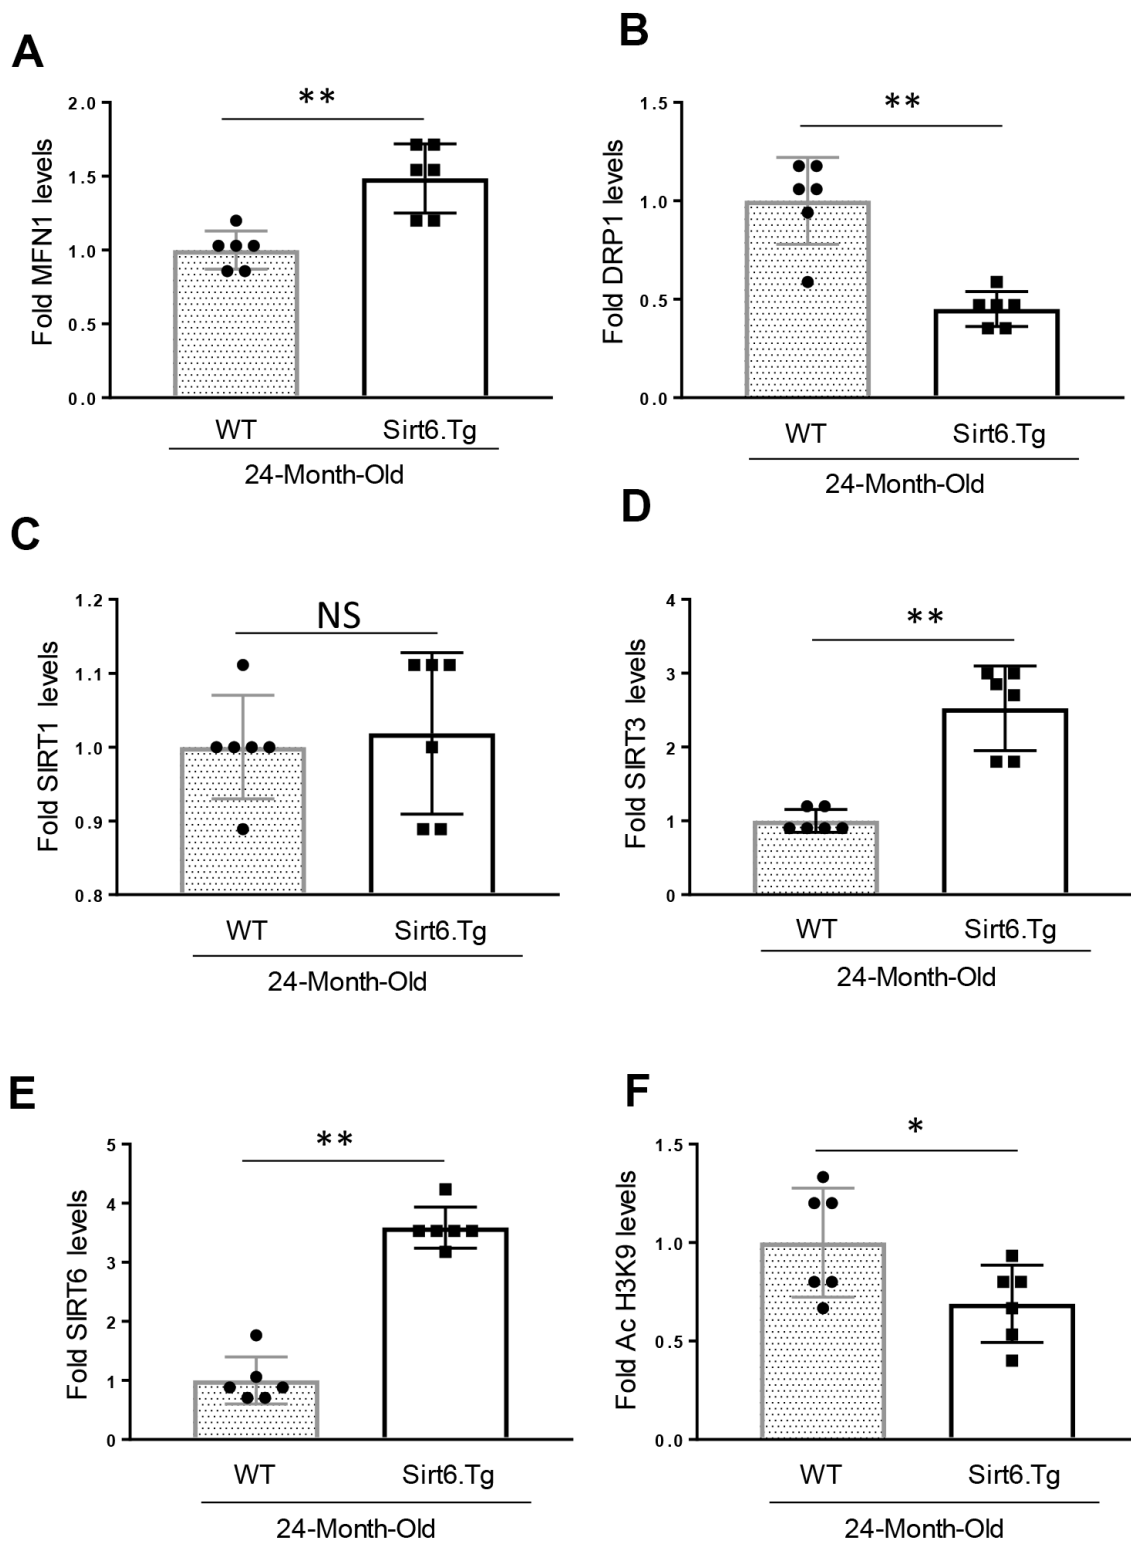

**Supplementary Figure 6.** Quantification of the western blot in Figure 6E: (A–F). Quantification of relative MFN1, DRP1, Sirt1, Sirt3, Sirt6, and acetylated histone H3K9 levels in the heart of 24-month-old Wild type and Sirt6.Tg mice. Values are mean  $\pm$  SE,  $n = 6$ , \*  $P < 0.05$ , \*\*  $P < 0.01$  (NS=not significant).
